# Supplementary material for: K+-doped P6 crystals of NIR-upconverting NaYF4:Yb3+/Ho3+ conform to the ‘strain–intensity’ relationship
Source: Royal Society of Chemistry journal article supplement (doi:10.1039/d3ce00363a), 2023-01-01
Supplement: d3ce00363a1.pdf [file d3ce00363a1.pdf]

## Supporting Information

### **K<sup>+</sup>-Doped P $\bar{6}$ Crystals of NIR-Upconverting NaYF<sub>4</sub>:Yb<sup>3+</sup>/Ho<sup>3+</sup> conforms to the ‘Strain-Intensity’ Relationship**

Amreeta Swain<sup>†</sup>, Preeti Verma<sup>†</sup>, Manvendra Narayan Singh<sup>§</sup>, Parasmani Rajput<sup>¶,¥</sup>, Rajendra Sharma<sup>⊥</sup> and Supratim Giri<sup>\*,†,£</sup>

<sup>†</sup>Department of Chemistry, National Institute of Technology, Rourkela, 769008, India

<sup>£</sup>Centre for Nanomaterials, National Institute of Technology, Rourkela, 769008, India

<sup>§</sup> Hard X-ray Applications Lab, Accelerator Physics and Synchrotrons Utilization Division, Raja Ramanna Centre for Advanced Technology, Indore - 452013, India

<sup>¶</sup>Beamline Development and Application Section, Bhabha Atomic Research Centre Trombay, Mumbai-400085, India

<sup>¥</sup>Homi Bhabha National Institute, Anushakti Nagar, Mumbai-400094, India

<sup>⊥</sup>Technical Physics Division, Bhabha Atomic Research Centre, Trombay Mumbai-400085, India

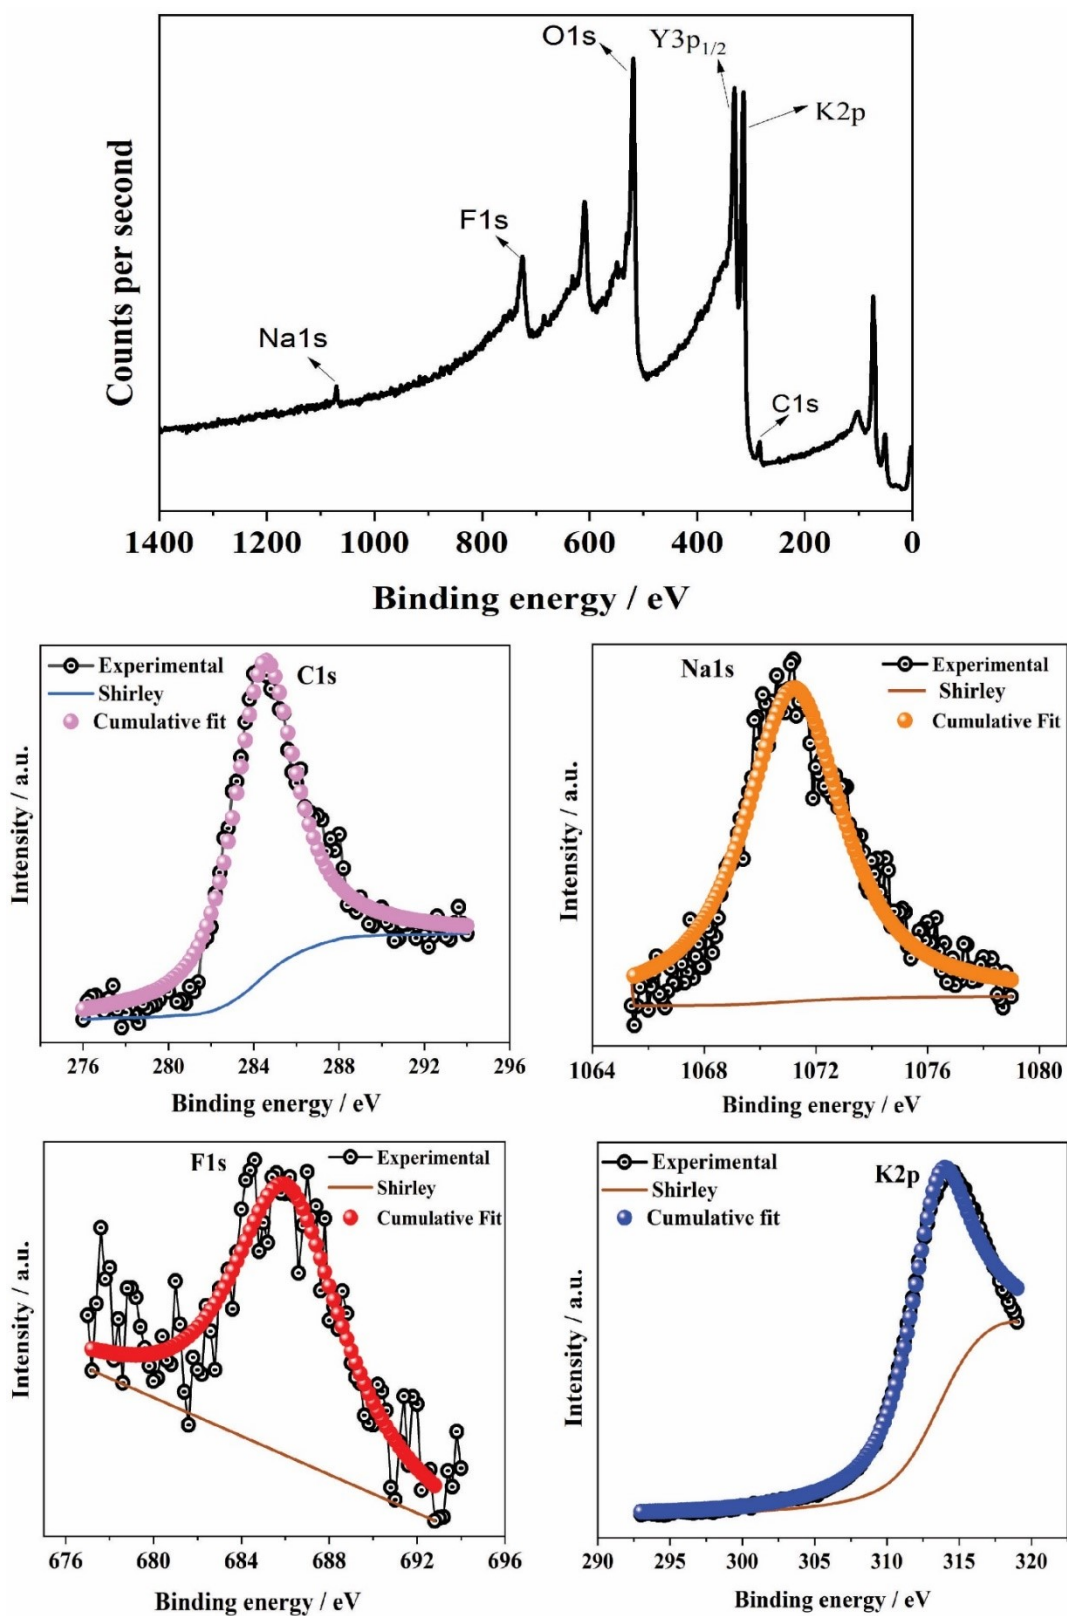

**Figure S1.** XPS spectrum of oleic acid capped sample K1 synthesized by thermal decomposition method and cumulative peak fit.

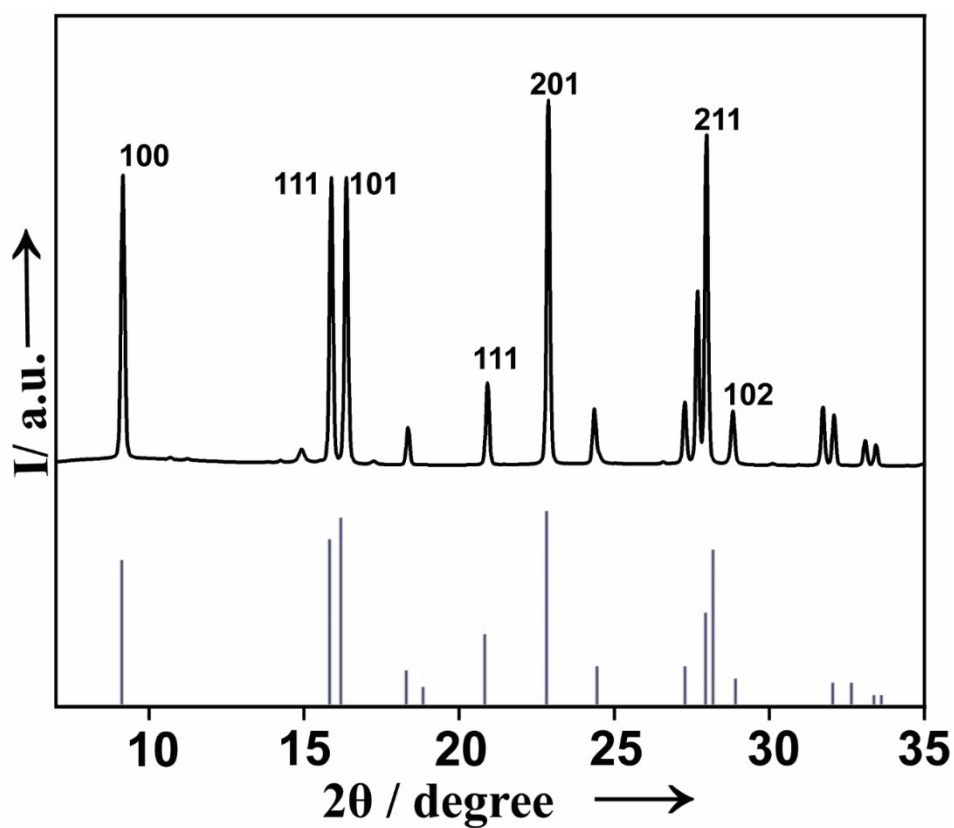

**Figure S2:** XRD pattern of as synthesized  $\beta\text{-NaYF}_4\text{:Yb}^{3+}/\text{Ho}^{3+}$  matching with the standard diffraction pattern of  $\beta\text{-NaYF}_4$  (JCPDS No-16-0334).

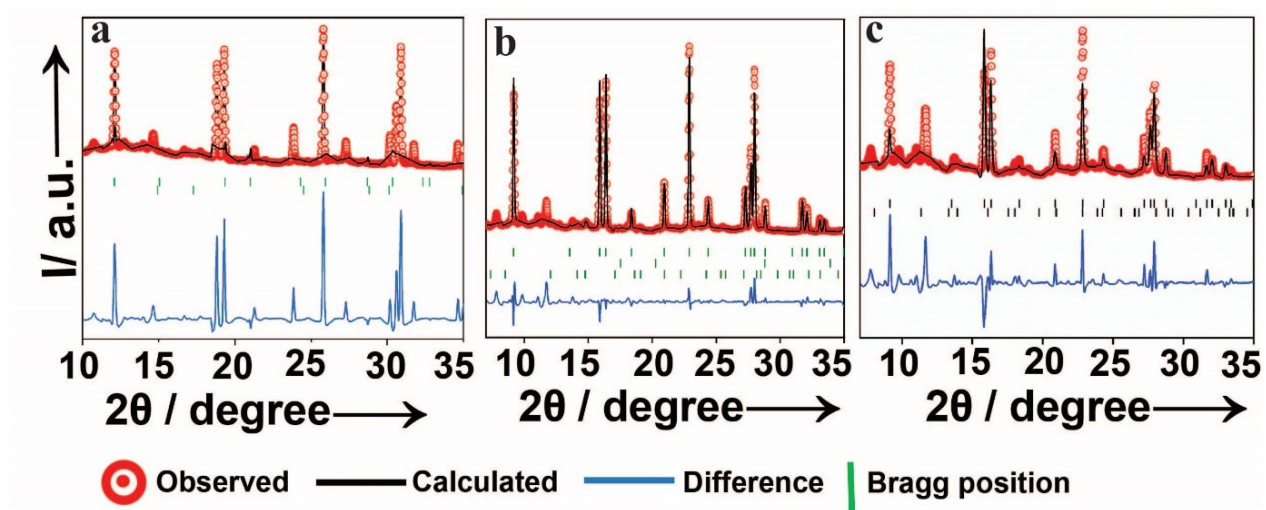

**Figure S3:** Rietveld refinement plots of ADXRD data of (a) K6 (b) K7 and (c) K8.

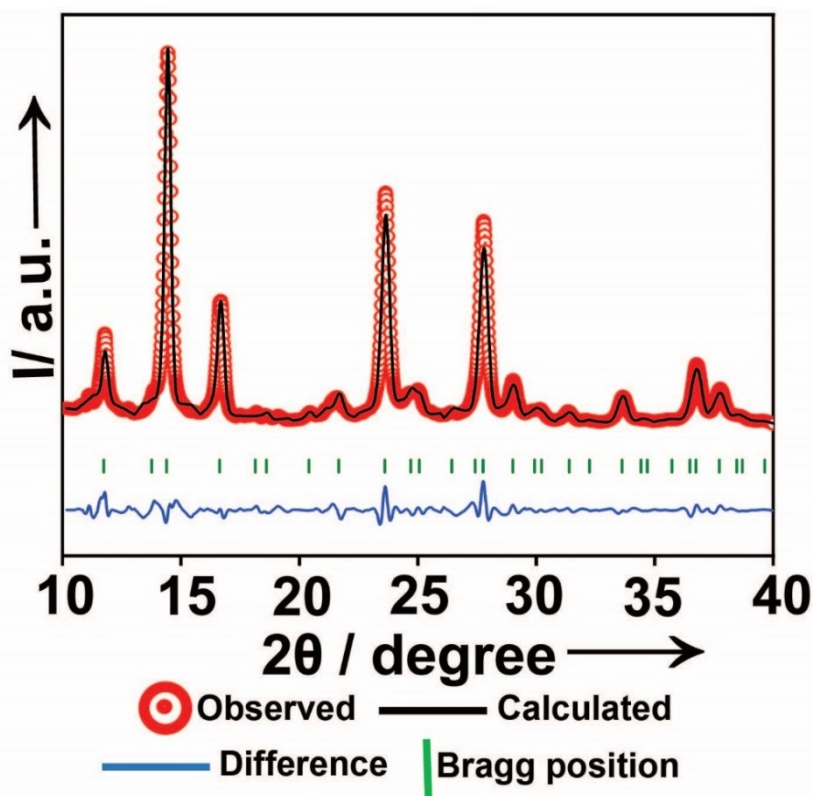

**Figure S4:** Rietveld refinement plot of cubic  $\text{KYb}_3\text{F}_{10}$  (K48).

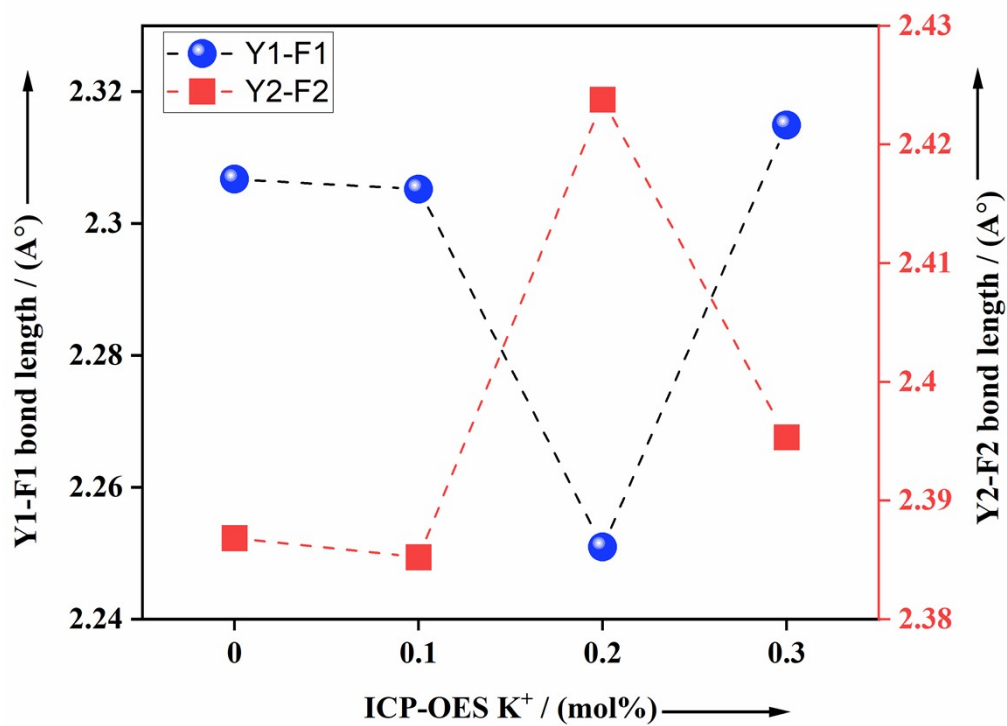

**Figure S5:** Y1-F1 and Y2-F2 bond lengths obtained from Rietveld refinement analysis of samples K0, K1, K2 and K3.

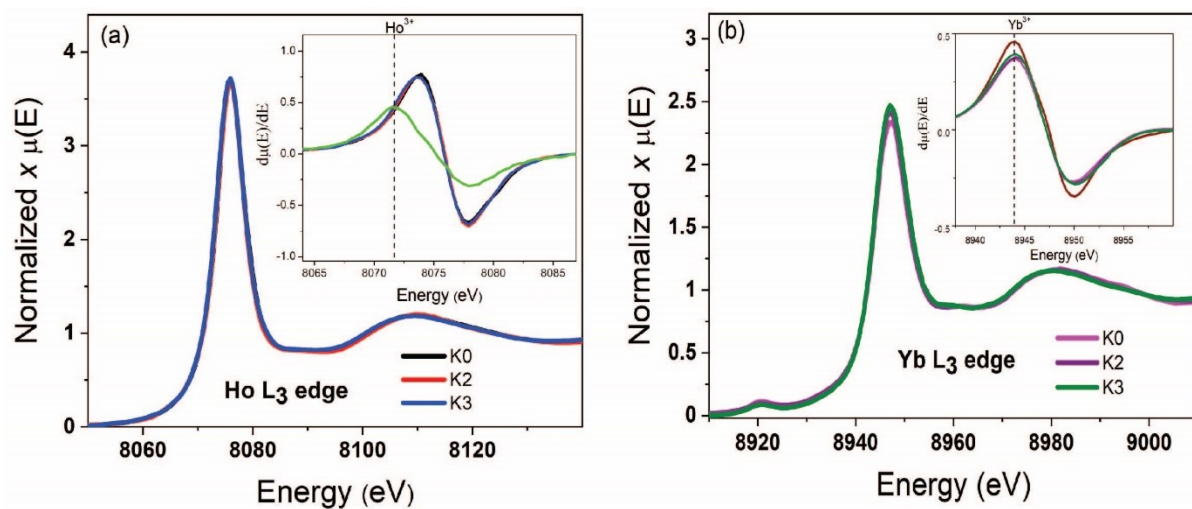

**Figure S6.** The normalized XANES spectra of samples K0, K2 and K3 at (a) Ho L<sub>3</sub> edge and (b) Yb L<sub>3</sub> edge. The inset shows the 1<sup>st</sup> derivative along with the reference's oxide (+3 state).

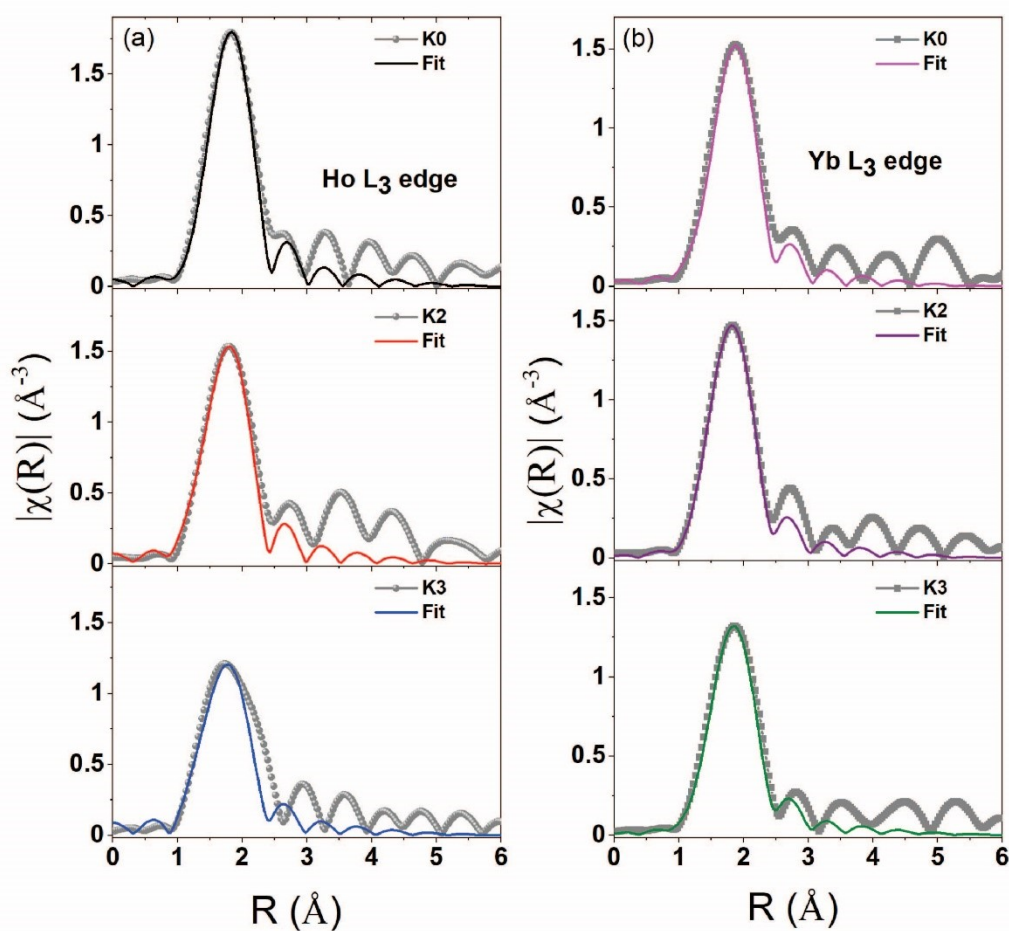

**Figure S7.** The Fourier Transform (FT) of  $k^2$ -weighted  $\chi(k)$  spectra of K0, K2 and K3 at (a) Ho L<sub>3</sub> edge and, (b) Yb L<sub>3</sub> edges, respectively.

**Table S1.** Shows the variation of CN (coordination number), R (bond distance) and  $\sigma^2$  (DebyeWaller factor) by EXAFS data fitting at Ho L<sub>3</sub>-edge, Y K-edge and Yb L<sub>3</sub>-edge. The numbers in parentheses indicate the uncertainty in the last digit.

|        | Ho L <sub>3</sub> -edge |                       |                                     | Y K-edge          |                      |                                    | Yb L <sub>3</sub> -edge |                       |                                     |
|--------|-------------------------|-----------------------|-------------------------------------|-------------------|----------------------|------------------------------------|-------------------------|-----------------------|-------------------------------------|
| Sample | CN <sub>Ho-F</sub>      | R <sub>Ho-F</sub> (Å) | $\sigma^2_{Ho-F}$ (Å <sup>2</sup> ) | CN <sub>Y-F</sub> | R <sub>Y-F</sub> (Å) | $\sigma^2_{Y-F}$ (Å <sup>2</sup> ) | CN <sub>Yb-F</sub>      | R <sub>Yb-F</sub> (Å) | $\sigma^2_{Yb-F}$ (Å <sup>2</sup> ) |
| K-0    | 8.6<br>(2)              | 2.274<br>(2)          | 0.0032<br>(3)                       | 7.2<br>(2)        | 2.379<br>(3)         | 0.0091<br>(3)                      | 8.2<br>(2)              | 2.277<br>(2)          | 0.0064<br>(3)                       |
| K-20   | 7.8<br>(2)              | 2.235<br>(3)          | 0.0046<br>(3)                       | 7.4<br>(2)        | 2.293<br>(2)         | 0.0085<br>(3)                      | 8.1<br>(2)              | 2.249<br>(3)          | 0.0064<br>(3)                       |
| K-30   | 7.4<br>(2)              | 2.232<br>(3)          | 0.0072<br>(3)                       | 7.5<br>(2)        | 2.211<br>(2)         | 0.0088<br>(3)                      | 7.8<br>(2)              | 2.271<br>(3)          | 0.0076<br>(3)                       |

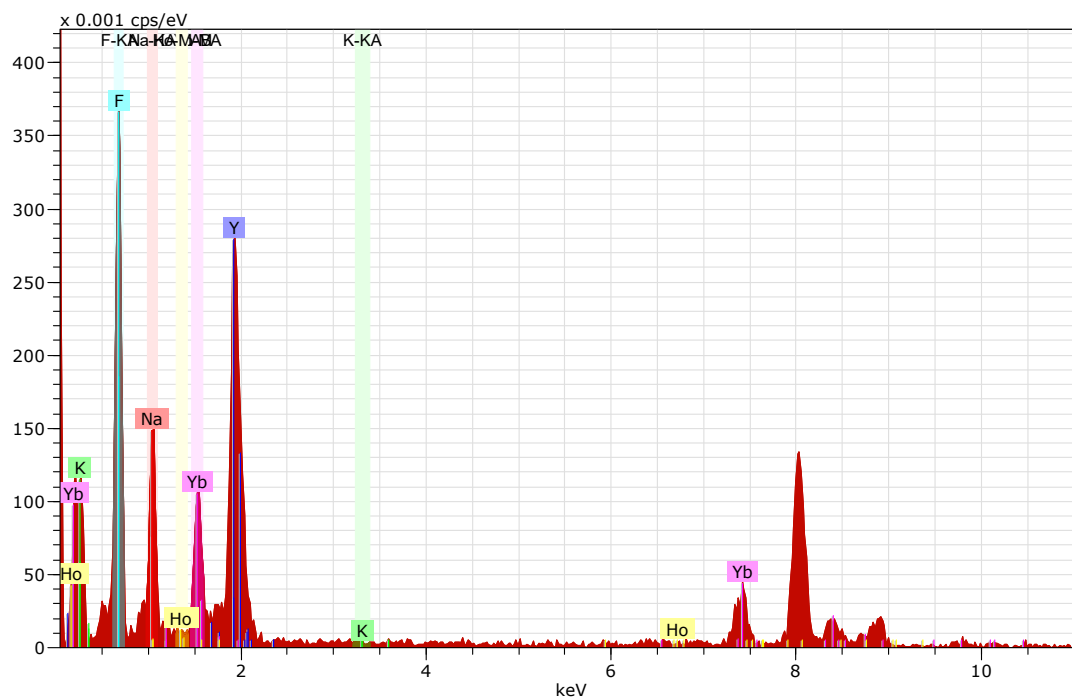

**Figure S8:** EDS spectra of sample K1.

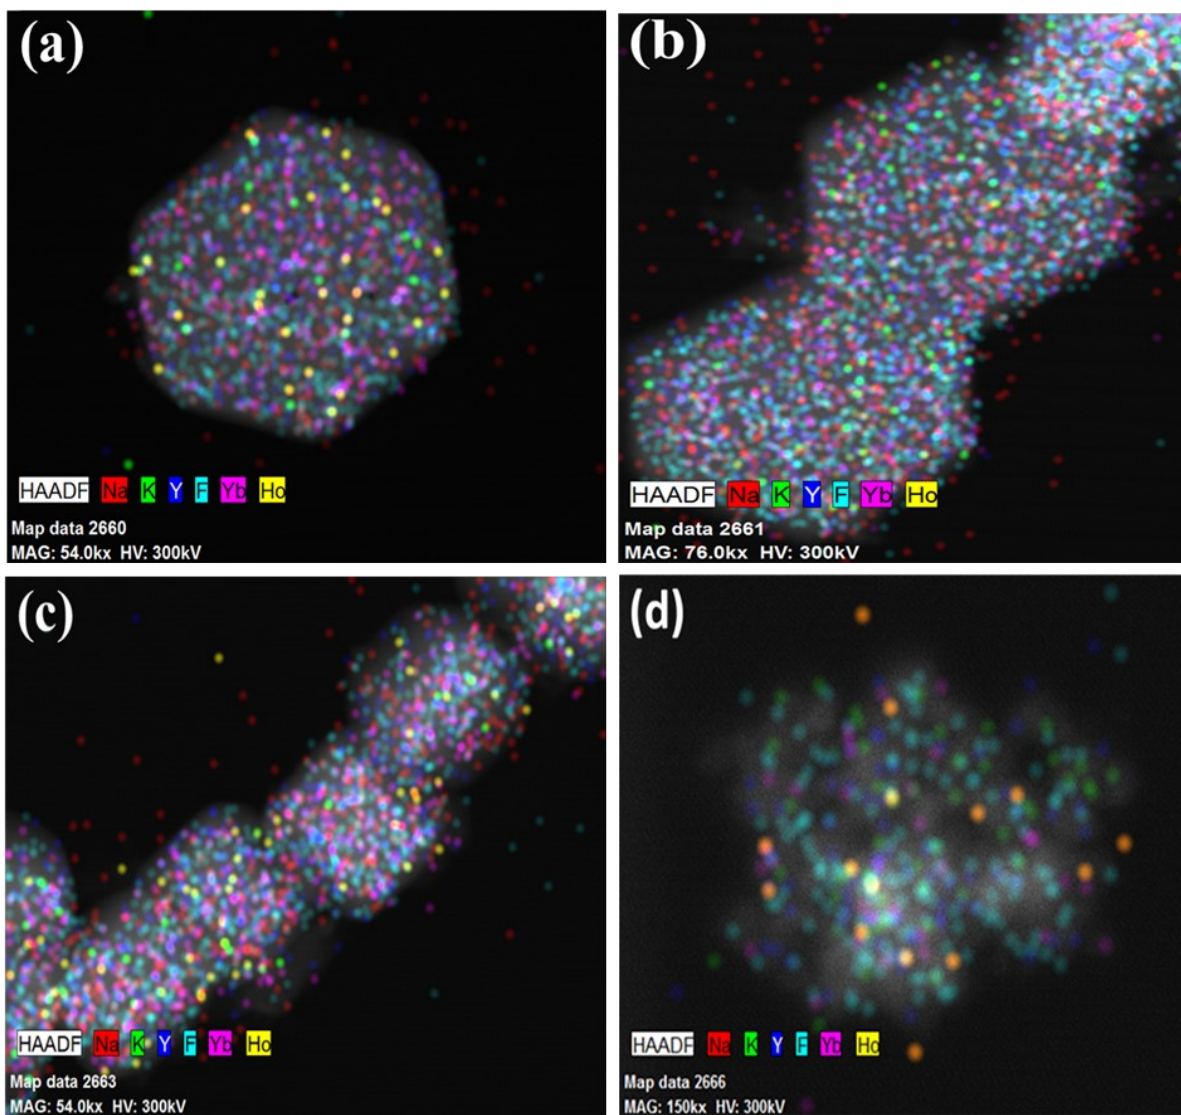

**Figure S9:** EDS-based elemental mapping of sample (a) K1, (b) K2, (c) K3, (d) K48

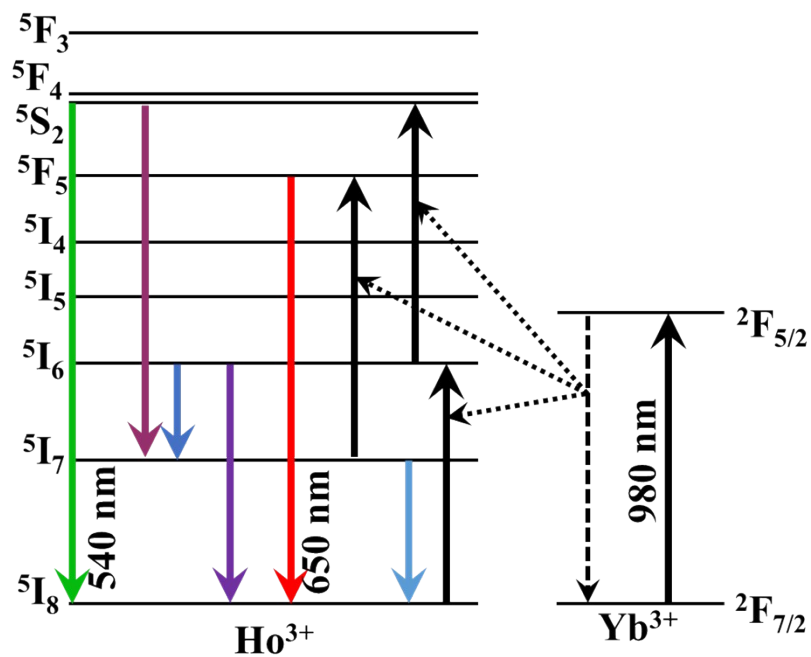

**Figure S10: Schematic of energy-level diagram of upconversion luminescence in  $\text{NaYF}_4:\text{Yb}^{3+}/\text{Ho}^{3+}$  involving  $\text{Yb}^{3+}$  (sensitiser) and  $\text{Ho}^{3+}$  (activator), and the proposed mechanism of upconversion luminescence.**



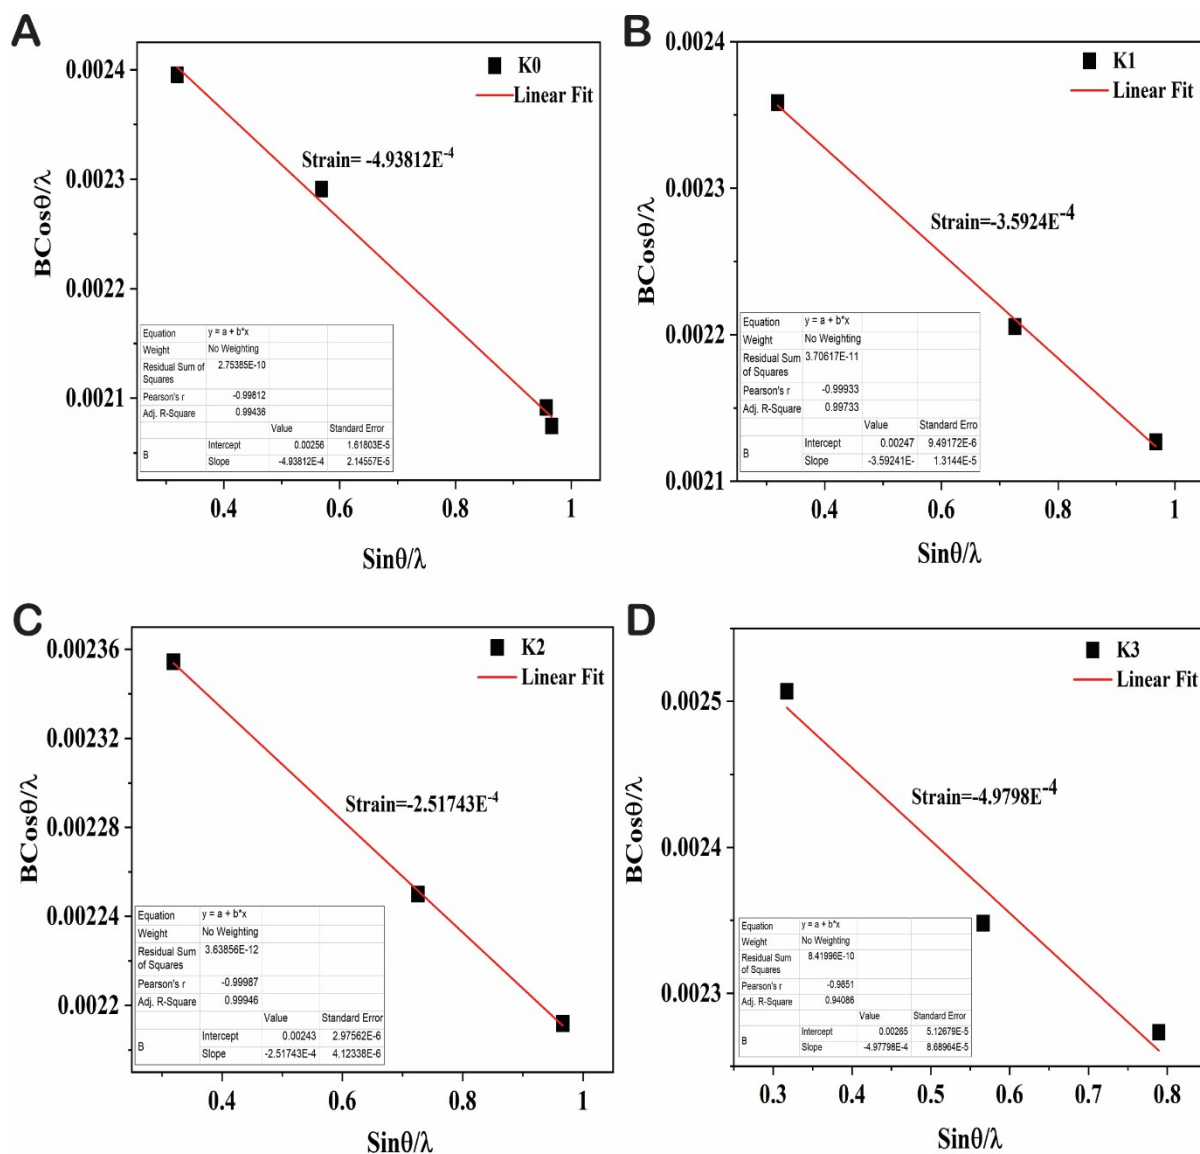

**Figure S11:** Williamson-Hall plots of samples K0 to K3 UC crystals. Strain is obtained from the slope of the fit.

### Lattice strain calculation using Williamson hall Plot

The micro strain present in the lattice of materials were calculated by Williamson Hall (W-H) plot governed by the mathematical equation:

$$\frac{\beta \cos\theta}{\lambda} = \frac{1}{D} + \frac{\varepsilon \sin\theta}{\lambda}$$

Where,  $\lambda$  is the wavelength of radiation (x-ray from synchrotron radiation= 0.75428 Å),  $\beta$  is full width at half maximum (FWHM) of diffraction peak,  $D$  is the crystallite size in Å,  $\theta$  is the peak position and  $\epsilon$  is the micro strain present in the sample. Plots are drawn between  $\sin\theta/\lambda$  and  $\beta\cos\theta/\lambda$  and micro strain is calculated from slope and particle size from intercept at Y-axis of the fit.
